# Supplementary material
Source: Springer Nature journal article supplement (https://www.springermedizin.de/resource/supplementary/12913_2008_818_MOESM2_ESM.pdf/9535648)

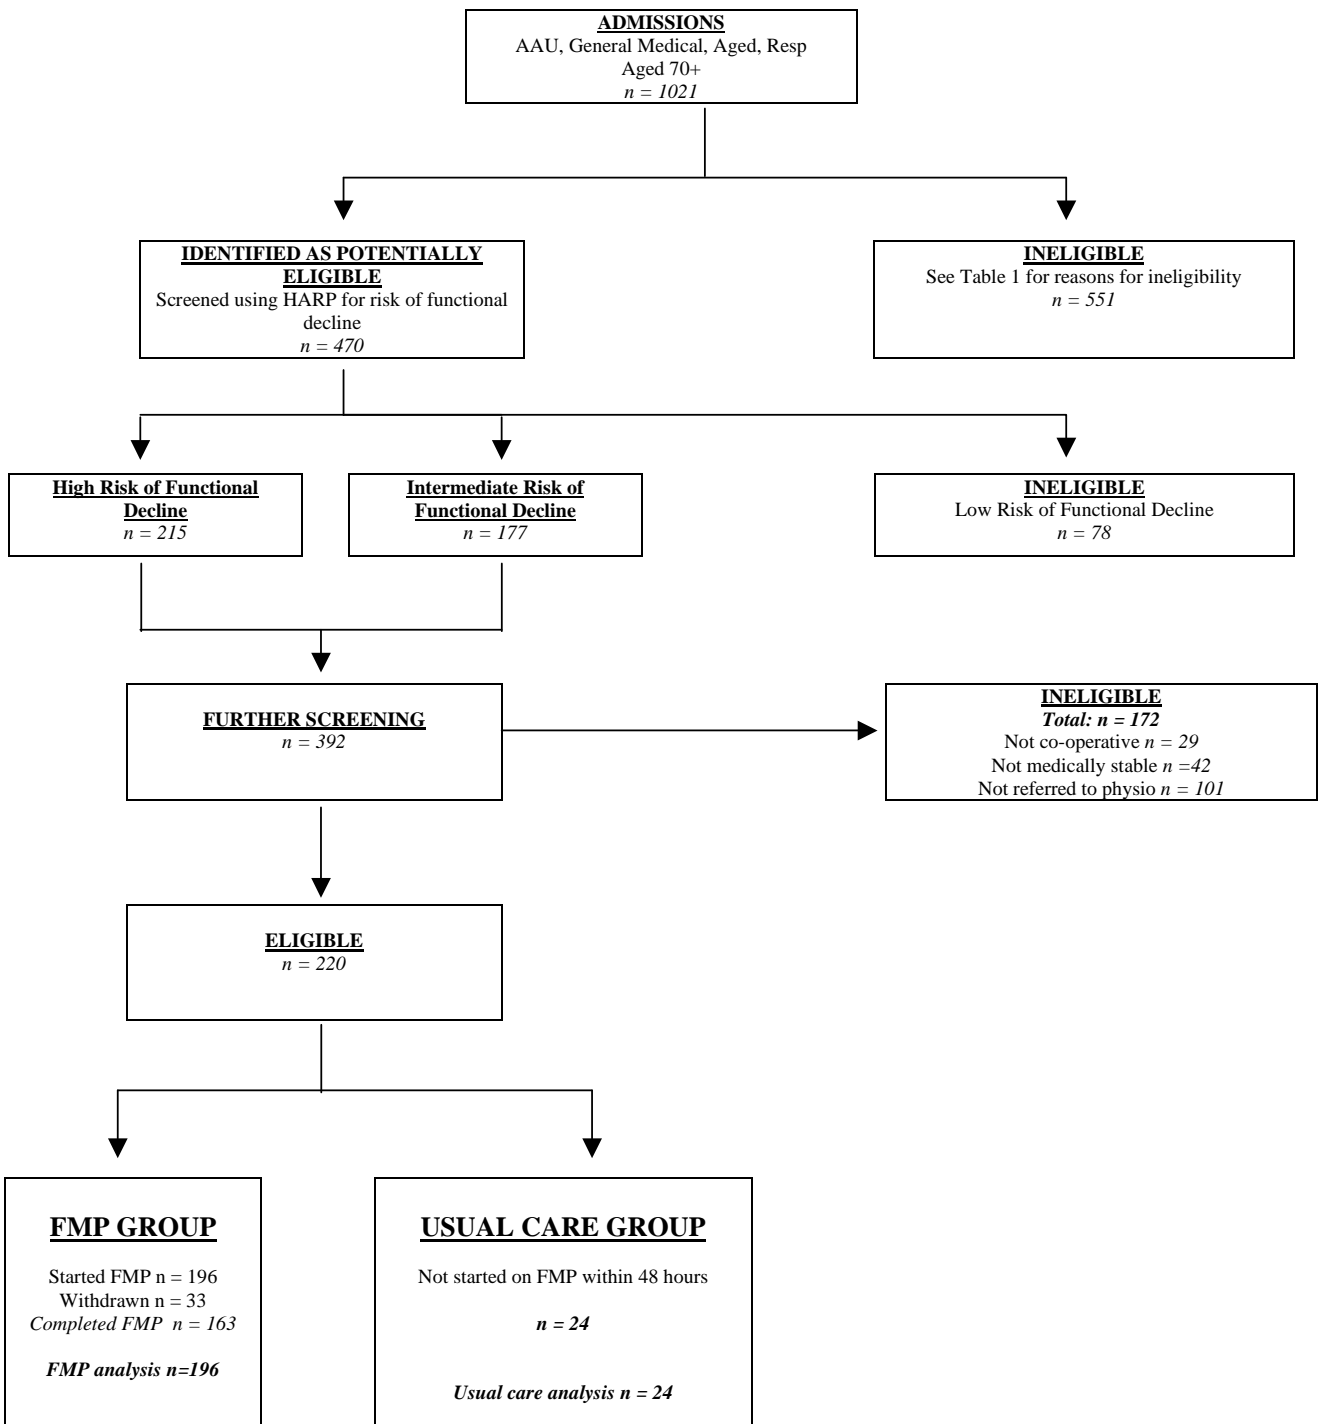

Supplement: MOESM2 [file 9535648]
